# Supplementary material
Source: Research Square preprint supplement (doi:10.21203/rs.3.rs-10073723/v1)
Supplement: Supplementary file 1 [file d45a74ee1f5625c427d868ca.xlsx]

## Sheet: Article details
Article title: Evaluation of artificial inoculation methods for phenotyping of bacterial spot disease in almond
Journal name: European Journal of Plant Pathology
Author names: Virajinee N.D. Bulathsinhalage, Eileen S. Scott, Diane E. Mather, Sam Rogers and Cassandra Collins
Author information:
Virajinee N.D. Bulathsinhalage
School of Agriculture, Food and Wine, Waite Campus, Adelaide University, Adelaide, South Australia 5064, Australia
ORCID: 0000-0003-3217-3101
Eileen S. Scott
School of Agriculture, Food and Wine, Waite Campus, Adelaide University, Adelaide, South Australia 5064, Australia
ORCID: 0000-0001-6829-519X
Diane E. Mather
School of Agriculture, Food and Wine, Waite Campus, Adelaide University, Adelaide, South Australia 5064, Australia
ORCID: 0000-0001-7506-2509
Sam Rogers
Biometry Hub, School of Agriculture, Food and Wine, Waite Campus, Adelaide University, Adelaide, South Australia 5064, Australia
ORCID: 0000-0002-8147-1239
Cassandra Collins (*)
School of Agriculture, Food and Wine, Waite Campus, Adelaide University, Adelaide, South Australia 5064, Australia
ORCID: 0000-0001-9626-4075
e-mail: cassandra.collins@adelaide.edu.au

## Sheet: Table S1
Table S1 Details of the statistical tests conducted under each artificial inoculation method
Artificial inoculation method	Year	Parameter	Type of statistical test used	Data Transformation method	Effect of cultiavr/Treatment	Effect of Xap strain	Interaction	Cultivar/Treatment	Mean	SE	Mean seperation groups	Post-hoc test		Xap Strain	Mean	SE	Mean seperation group	Post-hoc test
Needleless syringe method	2024	Percentage leaf area diseased	Two-way ANOVA	Not transformed	Significant (9.48e-12)	Not significant	Not significant	Carmel	10.13	0.43	a	Tukey's Test		DAR 72009	11.9	0.31	a	Tukey's Test
								Fritz	12.88	0.43	b	Tukey's Test		DAR 82623	12.63	0.31	a	Tukey's Test
								Marcona	15	0.43	c	Tukey's Test
								Nonpareil	11.04	0.43	a	Tukey's Test
		Lesion Diameter	Kruskal-Wallis test	Not transformed	Significant (1.671e-10)	Not significant	Significant(4.341e-09)	Carmel	4.06	0.101	a	Dunn's test		DAR 72009	4.5	0.106	a	Wilcoxon rank-sum test
								Fritz	4.21	0.0847	a	Dunn's test		DAR 82623	4.42	0.0833	a	Wilcoxon rank-sum test
								Marcona	5.25	0.109	b	Dunn's test
								Nonpareil	4.31	0.0893	a	Dunn's test
		Severity Score	Two-way ANOVA	Power transformation	Significant (0.00494)	Not significant	Not significant	Carmel	4.15	0.17	b	Tukey's Test		DAR 72009	3.95	0.12	a	Tukey's Test
								Fritz	4.33	0.16	b	Tukey's Test		DAR 82623	4.05	0.12	a	Tukey's Test
								Marcona	4.02	0.17	ab	Tukey's Test
								Nonpareil	3.44	0.2	a	Tukey's Test
		Infected Sites	Kruskal-Wallis test	Not transformed	Not significant	Not significant	Not significant	Carmel	5.92	0.0833	a	Dunn's test		DAR 72009	5.96	0.0417	a	Wilcoxon rank-sum test
								Fritz	6	0	a	Dunn's test		DAR 82623	6	0	a	Wilcoxon rank-sum test
								Marcona	6	0	a	Dunn's test
								Nonpareil	6	0	a	Dunn's test
Needleless syringe method	2025	Percentage leaf area diseased	Two-way ANOVA	Not transformed	Significant (7.73e-13)	Not significant	Not significant	Carmel	10.79	0.53	b	Tukey's Test		DAR 72009	10.79	0.37	a	Tukey's Test
								Fritz	12.21	0.53	bc	Tukey's Test		DAR 82623	11.1	0.37	a	Tukey's Test
								Marcona	13.67	0.53	c	Tukey's Test
								Nonpareil	7.12	0.53	a	Tukey's Test
		Lesion Diameter	Two-way ANOVA	Not transformed	Significant(0.03333)	Significant (0.00149)	Not significant	Carmel	3.75	0.09	ab	Tukey's Test		DAR 72009	3.58	0.06	a	Tukey's Test
								Fritz	3.65	0.09	ab	Tukey's Test		DAR 82623	3.87	0.06	b	Tukey's Test
								Marcona	3.94	0.09	b	Tukey's Test
								Nonpareil	3.58	0.09	a	Tukey's Test
			Kruskal-Wallis test	Not transformed	Not significant	Significant (0.006864)	Significant (0.008831)	Carmel	3.75	0.0851	a	Dunn's test		DAR 72009	3.58	0.0602	a	Wilcoxon rank-sum test
								Fritz	3.65	0.0766	a	Dunn's test		DAR 82623	3.88	0.0706	b	Wilcoxon rank-sum test
								Marcona	3.94	0.11	a	Dunn's test
								Nonpareil	3.58	0.103	a	Dunn's test
		Severity score	Kruskal-Wallis test	Not transformed	Significant (0.001098)	Significant(0.04059)	Significant (0.002772)	Carmel	4.75	0.0903	ab	Dunn's test		DAR 72009	4.85	0.0729	a	Wilcoxon rank-sum test
								Fritz	4.96	0.0417	a	Dunn's test		DAR 82623	4.69	0.0797	b	Wilcoxon rank-sum test
								Marcona	4.96	0.0417	a	Dunn's test
								Nonpareil	4.42	0.169	b	Dunn's test
		Infected Sites	Can not use any statistical test as all cultivars have similar number of infected sites					Carmel	6	0		Based on raw data		DAR 72009	6	0		Based on raw data
								Fritz	6	0		Based on raw data		DAR 82623	6	0		Based on raw data
								Marcona	6	0		Based on raw data
								Nonpareil	6	0		Based on raw data
Detached shoot method	2024	Percentage leaf area diseased	LMM(Linear Mixed Model)	Log	Not significant	Not significant	Not significant	Marcona	12.92	0.44	a	Tukey's Test		DAR 72009	12.16	0.41	a	Tukey's Test
								Nonpareil	12.23	0.42	a	Tukey's Test		DAR 82623	12.99	0.44	a	Tukey's Test
		Lesion Diameter	LMM(Linear Mixed Model)	Not transformed	Not significant	Not significant	Not significant	Marcona	3.8	0.2	a	Tukey's Test		DAR 72009	3.64	0.2	a	Tukey's Test
								Nonpareil	3.87	0.2	a	Tukey's Test		DAR 82623	4.02	0.2	a	Tukey's Test
			Kruskal-Wallis test	Not transformed	Not significant	Not significant	Significant (0.002069)	Marcona	3.8	0.146	a	Wilcoxon rank-sum test		DAR 72009	3.64	0.0798	a	Wilcoxon rank-sum test
								Nonpareil	3.87	0.53	a	Wilcoxon rank-sum test		DAR 82623	4.03	0.128	a	Wilcoxon rank-sum test
		Severity Score	LMM (Linear Mixed Model)	Sqrt	Not significant	Not significant	Not significant	Marcona	4.6	0.09	a	Tukey's Test		DAR 72009	4.69	0.1	a	Tukey's Test
								Nonpareil	4.62	0.09	a	Tukey's Test		DAR 82623	4.54	0.09	a	Tukey's Test
			Kruskal-Wallis test	Not transformed	Not significant	Not significant	Significant (0.01271)	Marcona	4.62	0.0633	a	Wilcoxon rank-sum test		DAR 72009	4.7	0.0597	a	Wilcoxon rank-sum test
								Nonpareil	4.63	0.0627	a	Wilcoxon rank-sum test		DAR 82623	4.55	0.0648	a	Wilcoxon rank-sum test
		Infected Sites	Can not use any linear tests-have similar means					Marcona	5.98	0.0167		Raw means & SE		DAR 72009	5.97	0.0333		Raw means & SE
								Nonpareil	5.93	0.0467		Raw means & SE		DAR 82623	5.95	0.037		Raw means & SE
			Kruskal-Wallis test	Not transformed	Not significant	Not significant	Not significant	Marcona	5.98	0.0167	a	Wilcoxon rank-sum test		DAR 72009	5.97	0.0333	a	Wilcoxon rank-sum test
								Nonpareil	5.93	0.0467	a	Wilcoxon rank-sum test		DAR 82623	5.95	0.037	a	Wilcoxon rank-sum test
Detached shoot method	2025	Percentage leaf area diseased	LMM (Linear Mixed Model)	Sqrt	Significant (0.01813)	Not significant	Not significant	Marcona	14.33	0.52	b	Tukey's Test		DAR 72009	13.17	0.5	a	Tukey's Test
								Nonpareil	12.51	0.48	a	Tukey's Test		DAR 82623	13.64	0.51	a	Tukey's Test
		Lesion Diameter	Kruskal-Wallis test	Not transformed	Significant (0.01213)	Significant (0.0151)	Significant (0.001989)	Marcona	2.93	0.0302	a	Wilcoxon rank-sum test		DAR 72009	3.02	0.0419	a	Wilcoxon rank-sum test
								Nonpareil	3.04	0.0342	b	Wilcoxon rank-sum test		DAR 82623	2.95	0.0195	b	Wilcoxon rank-sum test
		Severity Score	Can not apply any type of tests due to equal means		Did not measure statistically			Marcona	5	0		Based on raw data		DAR 72009	5	0		Based on raw data
								Nonpareil	5	0		Based on raw data		DAR 82623	5	0		Based on raw data
		Infected Sites	Kruskal-Wallis test	Not transformed	Not significant	Significant (0.01236)	Significant (0.007356)	Marcona	5.98	0.0167	a	Wilcoxon rank-sum test		DAR 72009	5.75	0.111	a	Wilcoxon rank-sum test
								Nonpareil	5.77	0.11	a	Wilcoxon rank-sum test		DAR 82623	6	0	b	Wilcoxon rank-sum test
Attached shoot method-Shade house	2024	Percentage leaf area diseased	LMM(Linear Mixed Model)	Log	Not relevant-single cultivar	Not significant	Not relevant-single cultivar	Nonpareil	Not relevant					DAR 72009	8.33	0.44	a	Tukey's Test
														DAR 82623	8.84	0.47	a	Tukey's Test
		Lesion Diameter	Kruskal-Wallis test	Not transformed	Not relevant-single cultivar	Not significant	Not relevant-single cultivar	Nonpareil	Not relevant					DAR 72009	3.98	0.0167	a	Wilcoxon rank-sum test
														DAR 82623	4	0	a	Wilcoxon rank-sum test
		Severity Score	Kruskal-Wallis test	Not transformed	Not relevant-single cultivar	Significant (9.818e-05)	Not relevant-single cultivar	Nonpareil	Not relevant					DAR 72009	2.5	0.208	a	Wilcoxon rank-sum test
														DAR 82623	4	0.263	b	Wilcoxon rank-sum test
		Infected Sites	Kruskal-Wallis test	Not transformed	Not relevant-single cultivar	Not significant	Not relevant-single cultivar	Nonpareil						DAR 72009	5.4	0.163	a	Wilcoxon rank-sum test
								Nonpareil						DAR 82623	5.4	0.132	a	Wilcoxon rank-sum test
Attached shoot method-Shade house	2025	Percentage leaf area diseased	LMM(Linear Mixed Model)	Not transformed	Not relevant-single cultivar	Significant (0.000141452)	Not relevant-single cultivar	Nonpareil	Not relevant					DAR 72009	5.17	0.86	a	Tukey's Test
														DAR 82623	12.4	0.86	b	Tukey's Test
		Lesion Diameter	Kruskal-Wallis test	Not transformed	Not relevant-single cultivar	Significant (0.003091)	Not relevant-single cultivar	Nonpareil	Not relevant					DAR 72009	2.68	0.0973	a	Wilcoxon rank-sum test
														DAR 82623	2.97	0.0532	b	Wilcoxon rank-sum test
		Severity Score	Could not fit to any statistical test due to presence of similar scores					Nonpareil						DAR 72009	5	0		Based on raw data
														DAR 82623	5	0		Based on raw data
		Infected Sites	Kruskal-Wallis test	Not transformed	Not relevant-single cultivar	Significant (1.541e-07)	Not relevant-single cultivar	Nonpareil	Not relevant					DAR 72009	3.47	0.313	a	Wilcoxon rank-sum test
														DAR 82623	5.67	0.111	b	Wilcoxon rank-sum test
Attached shoot method -Conducted using plants maintained within a mesh enclosure in an orchard	2025	Percentage leaf area diseased	LMM(Linear Mixed Model)	Not transformed	Can not measure**	Significant (0.033657)	Can not measure**	Fritz						DAR 72009	3.85	1.26	a	Tukey's Test
**In this experiment cultivar effect can not be accurately tested statisticaly due to pseudo replication (a single tree per cultivar)								Carmel						DAR 82623	8.72	1.26	b	Tukey's Test
								Marcona
								Nonpareil
		Lesion Diameter	Kruskal-Wallis test	Not transformed	Can not measure**	Not Significant	Can not measure**	Fritz						DAR 72009	2.14	0.167	a	Wilcoxon rank-sum test
								Carmel						DAR 82623	2.45	0.101	a	Wilcoxon rank-sum test
								Marcona
								Nonpareil
		Severity Score	Kruskal-Wallis test	Not transformed	Can not measure**	Significant (9.618e-08)	Can not measure**	Fritz						DAR 72009	3.28	0.237	a	Wilcoxon rank-sum test
								Carmel						DAR 82623	4.92	0.075	b	Wilcoxon rank-sum test
								Marcona
								Nonpareil
		Infected Sites	Kruskal-Wallis test	Not transformed	Can not measure**	Significant (1.155e-05)	Can not measure**	Fritz						DAR 72009	2.75	0.337	a	Wilcoxon rank-sum test
								Carmel						DAR 82623	4.85	0.207	b	Wilcoxon rank-sum test
								Marcona
								Nonpareil
Spray method	2024	Percentage leaf area diseased	LMM(Linear Mixed Model)	Log	Treatment effect is significant (0.01658)	Not significant	Not significant	Not-wounded	1.13	0.54	a	Tukey's Test		DAR 72009	3.33	1.51	a	Tukey's Test
								Wounded	6.84	3.05	b	Tukey's Test		DAR 82623	2.4	1.1	a	Tukey's Test
		Severity Score	Kruskal-Wallis test	Not transformed	Treatment effect is significant (0.0016)	Not significant	Significant (0.004948)	Not-wounded	3.49	0.208	a	Wilcoxon rank-sum test		DAR 72009	4.15	0.168	a	Wilcoxon rank-sum test
								Wounded	4.59	0.0936	b	Wilcoxon rank-sum test		DAR 82623	3.92	0.177	a	Wilcoxon rank-sum test
Spray method	2025	Percentage leaf area diseased	LMM(Linear Mixed Model)	Log	Treatment effect is not significant	Not significant	Not significant	Not-wounded	0.77	0.36	a	Tukey's Test		DAR 72009	0.64	0.31	a	Tukey's Test
								Wounded	1.02	0.47	a	Tukey's Test		DAR 82623	1.21	0.55	a	Tukey's Test
		Severity Score	Kruskal-Wallis test	Not transformed	Treatment effect is not significant	Not significant	Significant (0.001212)	Not-wounded	3.15	0.224	a	Wilcoxon rank-sum test		DAR 72009	2.9	0.225	a	Wilcoxon rank-sum test
								Wounded	3.25	0.223	a	Wilcoxon rank-sum test		DAR 82623	3.5	0.218	a	Wilcoxon rank-sum test

## Sheet: Table S2
Table S2 Descriptive statistics based on raw data for the attached shoot method conducted using almond cultivars maintained within a mesh enclosure in an orchard in 2025
Cultivar means across two Xap strains
Parameter	Cultivar	Mean	Median	SD	SE
Percentage leaf area diseased	Carmel	3.6	2.5	3.27	0.731
	Fritz	5.55	5	2.35	0.526
	Marcona	7.55	9	4.39	0.983
	Nonpareil	8.45	10	4.75	1.06
Lesion diameter	Carmel	1.62	1.5	0.944	0.211
	Fritz	2.7	2.75	0.34	0.0761
	Marcona	2.48	3	1.06	0.236
	Nonpareil	2.38	2.5	0.646	0.145
Severity score	Carmel	3.5	3.5	1.54	0.344
	Fritz	4.25	5	1.33	0.298
	Marcona	4.4	5	1.23	0.275
	Nonpareil	4.25	5	1.33	0.298
Infected sites	Carmel	2.45	2	2.06	0.462
	Fritz	3.6	4	1.35	0.303
	Marcona	4.5	6	2.21	0.495
	Nonpareil	4.65	5	1.81	0.406
Xap strain wise differences among cultivars-Based on percentage leaf area diseased
	Carmel		Fritz		Marcona		Nonpareil
Parameter	Xap strain	Mean	Xap strain	Mean	Xap strain	Mean	Xap strain	Mean
Percentage leaf area diseased	DAR 72009	1.1	DAR 72009	4.9	DAR 72009	4.6	DAR 72009	4.8
	DAR 82623	6.1	DAR 82623	6.2	DAR 82623	10.5	DAR 82623	12.1
